# Supplementary material for: Surface Modification of Nanoporous Anodic Alumina during Self-Catalytic Atomic Layer Deposition of Silicon Dioxide from (3-Aminopropyl)Triethoxysilane
Source: MDPI journal article supplement (doi:10.3390/ma14175052), 2021-09-03
Supplement: s1 [file s1]

# Surface Modification of Nanoporous Anodic Alumina during Self-Catalytic Atomic Layer Deposition of Silicon Dioxide from (3-Aminopropyl)Triethoxysilane

Ana Silvia González <sup>1,\*</sup>, Víctor Vega <sup>2</sup>, Ana Laura Cuevas <sup>3</sup>, María del Valle Martínez de Yuso <sup>4</sup>, Víctor M. Prida <sup>1</sup> and Juana Benavente <sup>5</sup>

<sup>1</sup> Departamento de Física, Facultad de Ciencias, Universidad de Oviedo, E-33007 Oviedo, Spain; vmpp@uniovi.es

<sup>2</sup> Laboratorio de Membranas Nanoporosas, Servicios Científico-Técnicos, Universidad de Oviedo, E-33006 Oviedo, Spain; vegavictor@uniovi.es

<sup>3</sup> Unidad de Nanotecnología, SCBI Centro, Universidad de Málaga, E-29071 Málaga, Spain; analaura.cuevas@uma.es

<sup>4</sup> Servicios Centrales de Investigación, Universidad de Málaga, E-29071 Málaga, Spain; myyuso@uma.es

<sup>5</sup> Departamento de Física Aplicada I, Facultad de Ciencias, Universidad de Málaga, E-29071 Málaga, Spain; j\_benavente@uma.es

\* Correspondence: gonzalezgana@uniovi.es

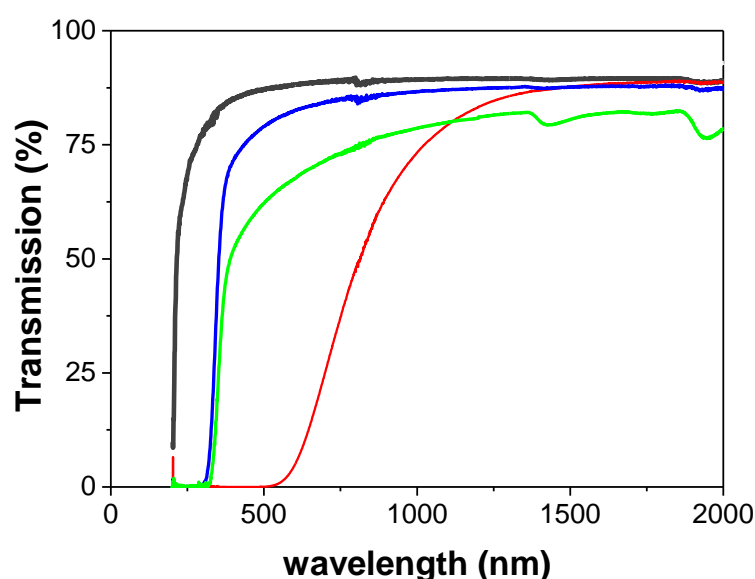

**Figure S1.** Transmission spectra for different nanoporous alumina-based structures with similar pore size ( $9 \pm 2$  nm) and porosity ( $7 \pm 2$  %), but different coating layers:  $\text{Al}_2\text{O}_3$  layer (black line),  $\text{Fe}_2\text{O}_3$  layer (red line),  $\text{TiO}_2$  layer (blue line) and  $\text{TiO}_2$  layer after bovine serum albumin coverage (green line) [1,2].

## References

1. Cuevas, A.L.; Martínez de Yuso, M.V.; Gelde, L.; Gonzalez, A.S.; Vega, V.; Prida, V.M.; Benavente, J. Chemical, optical and transport characterization of ALD modified nanoporous alumina based structures. *J. Ind. Eng. Chem.* **2020**, *91*, 139–148.
2. Gelde, L.; Cuevas, A.L.; Benavente, J. Influence of pore-size/porosity on ion transport and static BSA-fouling for  $\text{TiO}_2$ -covered nanoporous alumina membranes. *Appl. Sci.* **2021**, *11*, 5687.
